Development 133, 4391 (2006) doi:10.1242/dev.02661

***Arabidopsis* SPA proteins regulate photoperiodic flowering and interact with the floral inducer CONSTANS to regulate its stability**

**Sascha Laubinger, Virginie Marchal, José Gentilhomme, Stephan Wenkel, Jessika Adrian, Seonghoe Jang, Carmen Kulajta, Helen Braun, George Coupland and Ute Hoecker** *Development* **133**, 3213-3222.

The corresponding author's e-mail address was published incorrectly. The correct address is: hoeckeru@uni-koeln.de.

We apologise to authors and readers for this mistake.
